# Supplementary material for: Connecting climate science and society: reflections from early and mid-career researchers at the World Climate Research Programme Open Science Conference 2023
Source: Frontiers journal article supplement (doi:10.3389/fclim.2024.1501216), 2025-01-20
Supplement: Table_2.xlsx [file Table_2.xlsx]

## Sheet: institutes
institute	country	international institutes
1Universidad de Buenos Aires, Facultad de Ciencias Exactas y Naturales, Departamento de Ciencias de la Atmósfera y los Océanos (DCAO), Buenos Aires, Argentina	Argentina
2CONICET ‒ Universidad de Buenos Aires. Centro de Investigaciones del Mar y la Atmósfera (CIMA). Buenos Aires, Argentina.	Argentina
3Instituto Franco-Argentino de Estudios sobre el Clima y sus Impactos (IFAECI) – IRL 3351 – CNRS-CONICET-IRD-UBA. Buenos Aires, Argentina.	Argentina
44Instituto Argentino de Nivología, Glaciología y Ciencias Ambientales (IANIGLA), Centro Científico Tecnológico CONICET Mendoza, Mendoza, Argentina	Argentina
8Servicio Meteorológico Nacional (SMN Argentina), Buenos Aires city, Argentina	Argentina
18Department of Social Relations, East West University, Dhaka, Bangladesh	Bangladesh
38Caribbean Institute for Meteorology and Hydrology, Husbands, St. James, Barbados	Barbados
24ICMPA-UNESCO Chair/UAC, Cotonou, Bénin	Benin
46Faculty of Agronomic Sciences, University of Abomey-Calavi, Cotonou, Benin	Benin
31Climate Change Research Laboratory (CCRL), National Institute of Cartography, P.O. Box 157 Yaounde, Cameroon	Cameroon
34National Institute of Cartography, Yaoundé, Cameroon	Cameroon
43Laboratory for Environmental Modeling and Atmospheric Physics (LEMAP), University of Yaounde 1, Yaounde, Cameroon	Cameroon
20Bishop's University, Sherbrooke, Canada	Canada
32Département de Géographie, Université de Montréal, Montréal, QC, Canada	Canada
25Facultad de Arquitectura e Ingeniería. Institución Universitaria Colegio Mayor de Antioquia. Medellín-Colombia	Colombia
11Université Peleforo Gon Coulibaly, Département de Mathématiques-Physique-Chimie, Korhogo, Côte d’Ivoire	Côte d’Ivoire
30Univ Lyon, ENTPE, Ecole Centrale de Lyon, CNRS, LTDS, UMR 5513, 69518 Vaulx-en-Velin Cedex, France	France
36Institut Pierre-Simon Laplace, Paris, France	France
37Institut de Recherche pour le Développement, Marseille, France	France
22Lebniz Institute for Baltic Sea Research, Warnemünde, Germany	Germany
27Institute of Energy and Climate Research, Stratosphere (IEK–7), Forschungszentrum Jülich, 52425 Jülich, Germany	Germany
28Center for Advanced Simulation and Analytics (CASA), Forschungszentrum Jülich, Jülich, Germany	Germany
12University of Education-Winneba, Ghana	Ghana
21ACECoR, Centre for Coastal Management, University of Cape Coast, Ghana	Ghana
39Department of Architecture and Planning, National Institute of Technology Patna, India	India
10The University of the West Indies, Mona, Jamaica W.I.	Jamaica
17El Hassan Research Chair for Sustainability, Royal Scientific Society, Amman, Jordan	Jordan
33IGAD Climate Prediction and Applications Centre, Nairobi, Kenya	Kenya
19International Water Research Institute, University Mohammed VI Polytechnic, Benguerir, Morocco	Morocco
29Geology and Sustainable Mining Institute (GSMI), Mohammed VI Polytechnic University (UM6P), Ben Guerir 43150, Morocco	Morocco
48Environmental Science, University of Namibia, Windhoek, Namibia	Namibia
45International Center for Tropical Agriculture (CIAT), Dakar, Senegal	Senegal
5Centre for Climate Research Singapore, National Environment Agency	Singapore
13Climate System Analysis Group (CSAG), Department of Environmental and Geographical Science, University of Cape Town, Cape Town, South Africa	South Africa
14African Climate and Development Initiative (ACDI), Department of Environmental and Geographical Science, University of Cape Town, Cape Town, South Africa	South Africa
23Nansen-Tutu Centre for Marine Environmental Research, Department of Oceanography, University of Cape Town, Cape Town, South Africa	South Africa
41MANCOSA( Honoris Universities) South Africa	South Africa
42Durban University of Technology (South Africa)	South Africa
40Research Center for Climate Sciences (RCCS), Pusan National University, Busan, Republic of Korea	South Korea
7World Climate Research Programme, Science and Innovation Department, World Meteorological Organization, Switzerland	Switzerland
6Climate Adaptation and Disaster Risk Management Department, Deltares, Delft, The Netherlands	The Netherlands
26ECMWF, UK		Europe
4Department of Risk and Disaster Reduction, University College London, United Kingdom	United Kingdom
35College of Earth, Ocean, and Atmospheric Sciences, Oregon State University, Corvallis, Oregon, United States	United States
49The University of Zambia, Department of Geography and Environmental Studies, School of Natural Sciences, Lusaka, Zambia	Zambia
15African Institute for Mathematical Sciences, Research Innovation Centre (AIMS RIC)	Rwanda
16African Institute for Mathematical Sciences (AIMS)		Africa
47WASCAL (West African Science Service Centre on Climate Change and Adapted Land Use)	Nigeria
9Young Earth System Scientists (YESS) Community		South America
Centre for Earth Observation Science, University of Manitoba, Winnipeg, Manitoba, Canada	Morocco
Green Energy Park (UM6P and IRESEN), Benguerir, Morocco	Canada

## Sheet: author_nationalities
nationality_pers
Argentina
Morocco
France
Ghana
United Kingdom
United Kingdom
Morocco
Jamaica
Argentina
Cameroon
Colombia
Zimbabwe
Côte d´Ivoire
Argentina
Germany
Nigeria
Argentina
Cameroon
Argentina
India
Benin
The Netherlands
India
Zimbabwe
Benin
Cameroon
Trinidad and Tobago
Jordan
United Kingdom
Zambia
Togo
Niger
Senegal
Namibia
Bangladesh
India

## Sheet: age
Age (at OSC2023)
33
32
38
31
36
39
23
35
38
36
40
39
36
41
34
39
36
35
32
47
33
33
36
33
33
33
42
52
39
34
39
35
41
35
34

## Sheet: field
field	field_cleaned
climate variability	climate
climate services	climate
machine learning	machine
climate modelling	climate
coastal geomorphology	coastal
biogeochemistry	biogeochemistry
climate services	climate
climate modelling	climate
ecological transition in building environment	ecological transition in building environment
bushfire risk	bushfire risk
climate modelling	climate
climatology	climatology
climate change	climate
climate modelling	climate
hydroclimatology	hydroclimatology
climate services	climate
climate change	climate
climate modelling	climate
hydroclimatology	hydroclimatology
biological oceanography	biological
climate change mitigation	climate
carbon dioxide removal	carbon dioxide removal
climate modelling	climate
air-sea interaction	air-sea interaction
hydrological modelling	hydrological
climate modelling	climate
hydroclimatology	hydroclimatology
climate change impact	climate
renewable engergy	renewable
meterology	meterology
city planning	city planning
climate change	climate
physical oceanography	physical
climate services	climate
climate modelling	climate
physical oceanography	physical
climate services	climate
adaptation science	adaptation
climate services	climate
sea level change	sea level change
physical oceanography	physical
geophysics	geophysics
paleoclimate	paleoclimate
climate services	climate
climate modelling	climate
climate services	climate
climate services for sustainalbe development	climate
climate modelling	climate
climate modelling	climate
atmospheric science	atmospheric
GIS	GIS
remote sensing	remote sensing
flood simulation	flood
flood modelling	flood
environmental sciences	environmental
climate mobility	climate
climate finance governance	climate
urpan adaptation	urban adaptation
seasonal prediction	seasonal
	variability
	services
	learning
	modelling
	geomorphology
	services
	modelling
	modelling
	change
	modelling
	services
	change
	modelling
	oceanography
	change
	modelling
	modelling
	modelling
	change
	engergy
	change
	oceanography
	services
	modelling
	oceanography
	services
	science
	services
	oceanography
	services
	modelling
	services
	services
	modelling
	modelling
	science
	simulation
	modelling
	sciences
	mobility
	finance governance
	prediction
	sustainable development
	mitigation
	impact

## Sheet: degree
degree
PhD
PhD
PhD
PhD
PhD
PhD
PhD
PhD
PhD
PhD
PhD
PhD
PhD
PhD
PhD
PhD
PhD
PhD
B.Sc.
PhD
PhD
PhD
PhD
PhD
PhD
PhD
PhD
PhD
PhD
PhD
PhD
PhD
PhD
M.Sc.
PhD
M.Sc.
PhD

## Sheet: gender
gender
Male
Male
Male
Male
Female
Female
Female
Female
Female
Male
Male
Female
Female
Male
Female
Male
Female
Male
Female
Male
Male
Female
Female
Female
Male
Male
Male
Female
Female
Male
Female
Male
Male
Male
Male
Male
Female

## Sheet: carreer_stage
career_stage
ECR
ECR
MCR
ECR
ECR
ECR
ECR
ECR
MCR
ECR
ECR
ECR
ECR
MCR
ECR
ECR
ECR
ECR
ECR
ECR
ECR
ECR
ECR
MCR
ECR
ECR
MCR
MCR
MCR
MCR
ECR
ECR
MCR
ECR
ECR
MCR
ECR
